# Supplementary material for: Effects of Complete Oral Motor Intervention and Nonnutritive Sucking Alone on the Feeding Performance of Premature Infants: A Systematic Review and Meta-Analysis
Source: MDPI journal article supplement (doi:10.3390/children11010004), 2023-12-20
Supplement: s1 [file s1]

## Search Strategy

| Database                           | # | Search syntax                                                                                                                                                                                                                                                                                                                                                                                                                                                                                                                                                                                                                                                                                                                                                                                                                                                                                                                                                                                                                                                                                                                                                                                                                                                                                                                                                                                                                                                                                                                                                                                                                                                                                                                                                                                                                                                                                                                                                                                                 | Citations found |
|------------------------------------|---|---------------------------------------------------------------------------------------------------------------------------------------------------------------------------------------------------------------------------------------------------------------------------------------------------------------------------------------------------------------------------------------------------------------------------------------------------------------------------------------------------------------------------------------------------------------------------------------------------------------------------------------------------------------------------------------------------------------------------------------------------------------------------------------------------------------------------------------------------------------------------------------------------------------------------------------------------------------------------------------------------------------------------------------------------------------------------------------------------------------------------------------------------------------------------------------------------------------------------------------------------------------------------------------------------------------------------------------------------------------------------------------------------------------------------------------------------------------------------------------------------------------------------------------------------------------------------------------------------------------------------------------------------------------------------------------------------------------------------------------------------------------------------------------------------------------------------------------------------------------------------------------------------------------------------------------------------------------------------------------------------------------|-----------------|
| <b>1)<br/>Embase</b>               | 1 | (Premature OR Preterm OR "Low birth weight" OR VLBW OR LBW OR Newborn OR Neonat* OR Infan*):ti,ab,kw,de                                                                                                                                                                                                                                                                                                                                                                                                                                                                                                                                                                                                                                                                                                                                                                                                                                                                                                                                                                                                                                                                                                                                                                                                                                                                                                                                                                                                                                                                                                                                                                                                                                                                                                                                                                                                                                                                                                       | 1914239         |
|                                    | 2 | "Prematurity"/exp OR "Low birth weight"/exp                                                                                                                                                                                                                                                                                                                                                                                                                                                                                                                                                                                                                                                                                                                                                                                                                                                                                                                                                                                                                                                                                                                                                                                                                                                                                                                                                                                                                                                                                                                                                                                                                                                                                                                                                                                                                                                                                                                                                                   | 186258          |
|                                    | 3 | (Oral OR "Oral motor" OR Oromotor OR Orocutaneous OR Prefeeding NEAR/3 Intervent* OR Stimulat* OR Train* OR Support*):ti,ab,kw,de                                                                                                                                                                                                                                                                                                                                                                                                                                                                                                                                                                                                                                                                                                                                                                                                                                                                                                                                                                                                                                                                                                                                                                                                                                                                                                                                                                                                                                                                                                                                                                                                                                                                                                                                                                                                                                                                             | 6488529         |
|                                    | 4 | (Non-nutritive OR "Non nutritive" OR nonnutritive OR Pacifier OR Dummy):ti,ab,kw,de                                                                                                                                                                                                                                                                                                                                                                                                                                                                                                                                                                                                                                                                                                                                                                                                                                                                                                                                                                                                                                                                                                                                                                                                                                                                                                                                                                                                                                                                                                                                                                                                                                                                                                                                                                                                                                                                                                                           | 11705           |
|                                    | 5 | "Non nutritive sucking"/exp OR "Pacifier"/exp                                                                                                                                                                                                                                                                                                                                                                                                                                                                                                                                                                                                                                                                                                                                                                                                                                                                                                                                                                                                                                                                                                                                                                                                                                                                                                                                                                                                                                                                                                                                                                                                                                                                                                                                                                                                                                                                                                                                                                 | 1091            |
|                                    | 6 | (#1 OR #2) AND #3 AND (#4 OR #5) AND [embase]/lim                                                                                                                                                                                                                                                                                                                                                                                                                                                                                                                                                                                                                                                                                                                                                                                                                                                                                                                                                                                                                                                                                                                                                                                                                                                                                                                                                                                                                                                                                                                                                                                                                                                                                                                                                                                                                                                                                                                                                             | All: 405        |
|                                    | 7 | <b>#6 AND</b> ("randomized controlled trial"/de OR "controlled clinical study"/de OR "randomization"/de OR "intermethod comparison"/de OR "double blind procedure"/de OR "human experiment"/de OR (random* OR placebo OR "parallel group\$" OR crossover OR "cross over" OR assigned OR allocated OR volunteer OR volunteers):ti,ab OR (open NEAR/1 label):ti,ab OR ((double OR single OR doubly OR singly) NEAR/1 (blind OR blinded OR blindly)):ti,ab OR ((assign* OR match OR matched OR allocation) NEAR/5 (alternate OR group\$ OR intervention\$ OR patient\$ OR subject\$ OR participant\$)):ti,ab OR (controlled NEAR/7 (study OR design OR trial)):ti,ab OR (compare OR compared OR comparison OR trial):ti OR ((evaluated OR evaluate OR evaluating OR assessed OR assess) AND (compare OR compared OR comparing OR comparison)):ab NOT (((random* NEAR/1 sampl* NEAR/7 ("cross section*" OR questionnaire\$ OR survey* OR database\$)):ti,ab NOT ("comparative study"/de OR "controlled study"/de OR "randomised controlled":ti,ab OR "randomly assigned":ti,ab)) OR ("cross-sectional study"/de NOT ("randomized controlled trial"/de OR "controlled clinical study"/de OR "controlled study"/de OR "randomised controlled":ti,ab OR "control group\$:ti,ab)) OR (((case NEAR/1 control*) AND random*) NOT "randomised controlled"):ti,ab) OR (("systematic review" NOT (trial OR study)):ti) OR ((nonrandom* NOT random*):ti,ab) OR ("random field*":ti,ab) OR (("random cluster" NEAR/3 sampl*):ti,ab) OR ((review:ab AND review/it) NOT trial:ti) OR ("we searched":ab AND (review:ti OR review/it)) OR ("update review":ab) OR ((databases NEAR/4 searched):ab) OR ((rat OR rats OR mouse OR mice OR swine OR porcine OR murine OR sheep OR lambs OR pigs OR piglets OR rabbit OR rabbits OR cat OR cats OR dog OR dogs OR cattle OR bovine OR monkey OR monkeys OR trout OR marmoset*):ti AND "animal experiment"/de) OR ("animal experiment"/de NOT ("human experiment"/de OR "human"/de))) | <b>RCT:176</b>  |
| <b>2)<br/>MEDLINE<br/>(PubMed)</b> | 1 | Premature OR Preterm OR "Low birth weight" OR VLBW OR LBW OR Newborn OR Neonat* OR Infan*                                                                                                                                                                                                                                                                                                                                                                                                                                                                                                                                                                                                                                                                                                                                                                                                                                                                                                                                                                                                                                                                                                                                                                                                                                                                                                                                                                                                                                                                                                                                                                                                                                                                                                                                                                                                                                                                                                                     | 1837529         |
|                                    | 2 | "Infant, Premature"[mh] OR "Infant, Low Birth Weight"[mh]                                                                                                                                                                                                                                                                                                                                                                                                                                                                                                                                                                                                                                                                                                                                                                                                                                                                                                                                                                                                                                                                                                                                                                                                                                                                                                                                                                                                                                                                                                                                                                                                                                                                                                                                                                                                                                                                                                                                                     | 92143           |
|                                    | 3 | ((Oral OR "Oral motor" OR Oromotor OR Orocutaneous OR Prefeeding) AND (Intervent* OR Stimulat* OR Train* OR Support*))                                                                                                                                                                                                                                                                                                                                                                                                                                                                                                                                                                                                                                                                                                                                                                                                                                                                                                                                                                                                                                                                                                                                                                                                                                                                                                                                                                                                                                                                                                                                                                                                                                                                                                                                                                                                                                                                                        | 475998          |
|                                    | 4 | Non-nutritive OR "Non nutritive" OR Nonnutritive OR Pacifier OR Dummy                                                                                                                                                                                                                                                                                                                                                                                                                                                                                                                                                                                                                                                                                                                                                                                                                                                                                                                                                                                                                                                                                                                                                                                                                                                                                                                                                                                                                                                                                                                                                                                                                                                                                                                                                                                                                                                                                                                                         | 7936            |
|                                    | 5 | "Placebos"[mh]                                                                                                                                                                                                                                                                                                                                                                                                                                                                                                                                                                                                                                                                                                                                                                                                                                                                                                                                                                                                                                                                                                                                                                                                                                                                                                                                                                                                                                                                                                                                                                                                                                                                                                                                                                                                                                                                                                                                                                                                | 39493           |
|                                    | 6 | (#1 OR #2) AND #3 AND (#4 OR #5)                                                                                                                                                                                                                                                                                                                                                                                                                                                                                                                                                                                                                                                                                                                                                                                                                                                                                                                                                                                                                                                                                                                                                                                                                                                                                                                                                                                                                                                                                                                                                                                                                                                                                                                                                                                                                                                                                                                                                                              | ALL: 411        |
|                                    | 7 | <b>#6 AND</b> (randomized controlled trial[pt] OR controlled clinical trial[pt] OR randomized[tiab] OR randomised[tiab] OR placebo[tiab] OR drug therapy[sh] OR randomly[tiab] OR trial[tiab] OR groups[tiab] NOT (animals [mh] NOT humans [mh]))                                                                                                                                                                                                                                                                                                                                                                                                                                                                                                                                                                                                                                                                                                                                                                                                                                                                                                                                                                                                                                                                                                                                                                                                                                                                                                                                                                                                                                                                                                                                                                                                                                                                                                                                                             | <b>RCT: 293</b> |
